# Supplementary material
Source: MDPI journal article supplement (https://www.mdpi.com/2073-4395/12/6/1289)

**Supplementary Table S1.** Median lethal concentration (LC<sub>50</sub>) values of different botanicals evaluated against 3rd instar larvae of fall armyworm *Spodoptera frugiperda*.

| Botanicals                  | Time (hr) | LC <sub>50</sub> (%) | Lower and upper 95%<br>Fiducial limits (%) | Chi-square | P-value* |
|-----------------------------|-----------|----------------------|--------------------------------------------|------------|----------|
| <i>Buxus papillosa</i>      | 24        | NC                   | NC                                         | NC         | NC       |
|                             | 48        | 179.68               | 102.81-1772.03                             | 2.87       | 0.00     |
|                             | 72        | 139.71               | 99.53-260.39                               | 6.20       | 0.00     |
| <i>Maerua arenaria</i>      | 24        | NC                   | NC                                         | NC         | NC       |
|                             | 48        | 138.74               | 99.45-253.76                               | 9.84       | 0.00     |
|                             | 72        | 180.81               | 108.89-810.13                              | 4.46       | 0.00     |
| <i>Monothea buxifolia</i>   | 24        | 214.23               | NC                                         | 2.60       | 0.00     |
|                             | 48        | 138.74               | 86.88-502.31                               | 2.34       | 0.00     |
|                             | 72        | 111.25               | 87.16-163.25                               | 15.18      | 0.00     |
| <i>Olea ferruginea</i>      | 24        | 111.25               | 87.16-163.25                               | 15.18      | 0.00     |
|                             | 48        | 111.92               | NC                                         | 1.85       | 0.00     |
|                             | 72        | 245.79               | NC                                         | 1.78       | 0.00     |
| <i>Peganum harmala</i>      | 24        | NC                   | NC                                         | NC         | NC       |
|                             | 48        | 171.39               | 106.72-590.40                              | 2.39       | 0.00     |
|                             | 72        | 154.68               | NC                                         | 1.88       | 0.00     |
| <i>Periploca aphylla</i>    | 24        | NC                   | NC                                         | NC         | NC       |
|                             | 48        | 178.59               | 107.88-781.54                              | 3.87       | 0.00     |
|                             | 72        | 131.04               | 95.85-226.18                               | 9.8        | 0.00     |
| <i>Rhazia stricta</i>       | 24        | 160.76               | 109.79-346.177                             | 7.76       | 0.00     |
|                             | 48        | 75.10                | 180.10-545.1                               | 4.56       | 0.00     |
|                             | 72        | 36.41                | 24.02-149.48                               | 3.77       | 0.00     |
| <i>Salvia moorcroftiana</i> | 24        | NC                   | NC                                         | NC         | NC       |
|                             | 48        | 178.59               | 107.88-781.54                              | 3.87       | 0.00     |
|                             | 72        | 131.04               | 95.85-226.18                               | 9.80       | 0.00     |
| <i>Solanum incanum</i>      | 24        | NC                   | NC                                         | NC         | NC       |
|                             | 48        | 178.59               | 107.88-781.54                              | 3.87       | 0.00     |
|                             | 72        | 111.25               | 87.17-163.25                               | 15.18      | 0.00     |
| <i>Solanum nigrum</i>       | 24        | NC                   | NC                                         | NC         | NC       |
|                             | 48        | 174.73               | 100.98-1442.20                             | 3.24       | 0.00     |
|                             | 72        | 136.48               | 98.09-247.65                               | 5.82       | 0.00     |
| <i>Sophora mollis</i>       | 24        | 195.08               | 114.75-1088.46                             | 4.8        | 0.00     |
|                             | 48        | 44.09                | 31.35-103.84                               | 1.46       | 0.00     |
|                             | 72        | 33.32                | 27.31-80.90                                | 2.52       | 0.00     |
| <i>Withania somnifera</i>   | 24        | 195.08               | 114.75-1088.46                             | 4.8        | 0.00     |
|                             | 48        | 40.42                | 29.14-86.24                                | 2.4        | 0.00     |
|                             | 72        | 30.21                | 24.31-80.90                                | 2.73       | 0.00     |

\* Since the significance level is less than 0.05, a heterogeneity factor is used in the calculation of confidence limits (NC=Not calculable)

**Supplementary Table S2.** Median lethal time (LT<sub>50</sub>) values of different botanicals evaluated against 3rd instar larvae of fall armyworm *Spodoptera frugiperda*.

| Botanicals                  | Concentrations (%) | LT <sub>50</sub> (hr) | Lower and upper 95% Fiducial limits (%) | Chi-square | P-value* |
|-----------------------------|--------------------|-----------------------|-----------------------------------------|------------|----------|
| <i>Buxus papillosa</i>      | 10                 | 96.97                 | 90.78-105.70                            | 10.49      | 0.00     |
|                             | 20                 | 93.73                 | 88.28-101.17                            | 13.79      | 0.00     |
|                             | 40                 | 92.69                 | 87.39-99.76                             | 23.37      | 0.00     |
| <i>Maerua arenaria</i>      | 10                 | 103.05                | 95.36-114.08                            | 22.42      | 0.00     |
|                             | 20                 | 99.19                 | 90.89-111.87                            | 25.52      | 0.00     |
|                             | 40                 | 97.22                 | 88.20-111.71                            | 35.92      | 0.00     |
| <i>Monothea buxifolia</i>   | 10                 | 95.35                 | 85.69-110.22                            | 36.60      | 0.00     |
|                             | 20                 | 92.23                 | 82.50-107.53                            | 43.94      | 0.00     |
|                             | 40                 | 95.10                 | 85.23-111.01                            | 44.75      | 0.00     |
| <i>Olea ferruginea</i>      | 10                 | 78.77                 | 75.47-82.73                             | 17.89      | 0.00     |
|                             | 20                 | 78.37                 | 74.83-82.61                             | 18.50      | 0.00     |
|                             | 40                 | 78.03                 | 73.54-83.71                             | 25.10      | 0.00     |
| <i>Peganum harmala</i>      | 10                 | 83.49                 | 78.54-90.25                             | 30.32      | 0.00     |
|                             | 20                 | 82.58                 | 77.87-88.93                             | 29.50      | 0.00     |
|                             | 40                 | 80.32                 | 74.99-87.81                             | 45.10      | 0.00     |
| <i>Periploca aphylla</i>    | 10                 | 102.92                | 93.61-117.54                            | 24.92      | 0.00     |
|                             | 20                 | 98.82                 | 90.66-111.23                            | 25.27      | 0.00     |
|                             | 40                 | 96.62                 | 87.46-111.48                            | 38.79      | 0.00     |
| <i>Rhazia stricta</i>       | 10                 | 57.78                 | 54.53-61.41                             | 65.36      | 0.00     |
|                             | 20                 | 55.02                 | 52.03-58.21                             | 57.37      | 0.00     |
|                             | 40                 | 54.89                 | 51.88-58.18                             | 57.54      | 0.00     |
| <i>Salvia moorcroftiana</i> | 10                 | 102.92                | 93.61-117.54                            | 24.92      | 0.00     |
|                             | 20                 | 98.82                 | 90.66-111.23                            | 25.27      | 0.00     |
|                             | 40                 | 96.62                 | 87.46-111.48                            | 38.79      | 0.00     |
| <i>Solanum incanum</i>      | 10                 | 95.59                 | 89.57-104.73                            | 2.52       | 0.00     |
|                             | 20                 | 95.25                 | 89.46-103.22                            | 14.70      | 0.00     |
|                             | 40                 | 93.07                 | 87.38-102.62                            | 7.4        | 0.00     |
| <i>Solanum nigrum</i>       | 10                 | 93.15                 | 87.83-100.39                            | 13.76      | 0.00     |
|                             | 20                 | 92.14                 | 86.95-99.06                             | 22.80      | 0.00     |
|                             | 40                 | 90.06                 | 83.52-99.59                             | 31.16      | 0.00     |
| <i>Sophora mollis</i>       | 10                 | 54.48                 | 52.46-56.65                             | 6.38       | 0.00     |
|                             | 20                 | 52.31                 | 50.31-54.44                             | 3.72       | 0.00     |
|                             | 40                 | 49.06                 | 47.10-51.33                             | 4.71       | 0.00     |
| <i>Withania somnifera</i>   | 10                 | 54.13                 | 52.13-56.26                             | 6.94       | 0.00     |
|                             | 20                 | 51.82                 | 49.84-53.94                             | 3.48       | 0.00     |
|                             | 40                 | 48.59                 | 46.77-50.50                             | 5.95       | 0.00     |

\*Since the significance level is less than 0.05, a heterogeneity factor is used in the calculation of confidence limits

**Supplementary Figure S1:** Corrected percent mortality (mean  $\pm$  SE; n = 10) of 3rd instar larvae of fall armyworm *Spodoptera frugiperda* by 20% methanolic extracts of different plant species recorded at different time intervals. Alphabets at bar tops indicate statistical difference among each botanical treatments at different time intervals (one-way ANOVA; HSD at  $\alpha = 0.05$ )

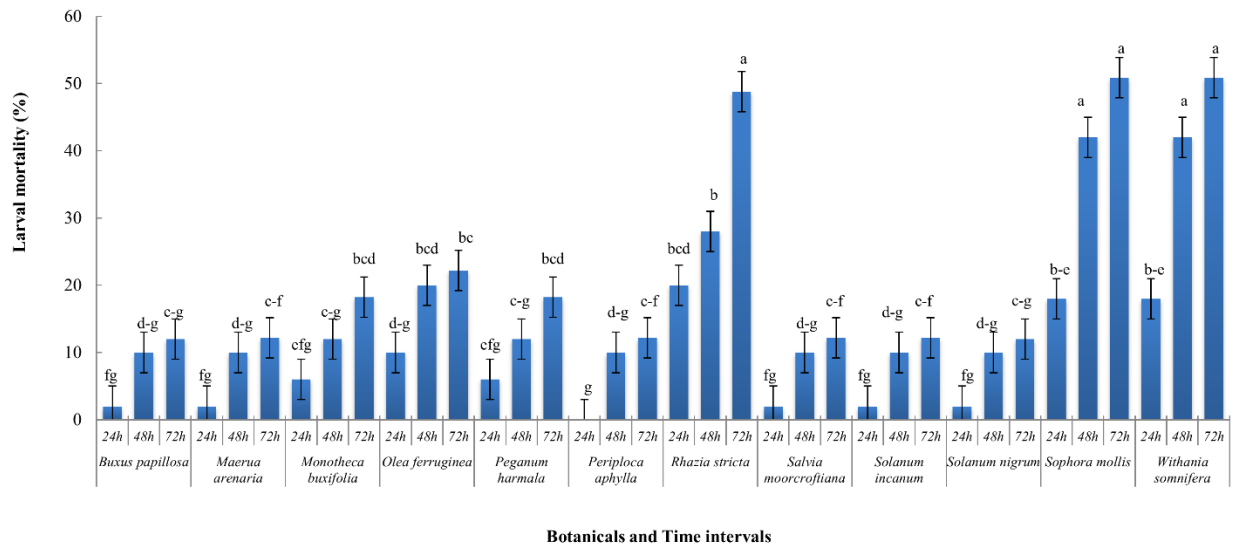

Supplement: s1 [file s1]
